# Supplementary material
Source: Royal Society of Chemistry journal article supplement (doi:10.1039/d6cp00757k)
Supplement: d6cp00757k1.pdf [file d6cp00757k1.pdf]

## DFT insights into opto-electronic properties of near infra-red absorber 1:1 perylene:TCNQ cocrystal towards photovoltaic application

Arkalekha Mandal,<sup>a\*</sup> Chris Erik Mohn<sup>a</sup>, Yusuf Chanchangi,<sup>b</sup> Carl Henrik Görbitz<sup>a</sup>

<sup>a</sup> Department of Chemistry, Blindern Campus, University of Oslo, Oslo 0371, Norway

<sup>b</sup> Environmental and Sustainability Institute, Faculty of Environment, Science and Economy, University of Exeter, Exeter, Penryn Campus, Cornwall TR10 9FE, United Kingdom

Email address: [arkalekha.mandal@kjemi.uio.no](mailto:arkalekha.mandal@kjemi.uio.no)

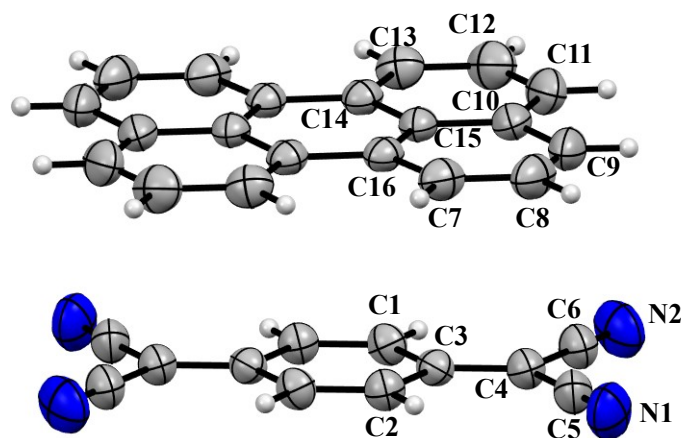

**Figure S1.** The *ORTEP* diagram of 1:1 perylene:TCNQ cocrystal of the literature reported structure, thermal ellipsoids are drawn with 50 % probability.

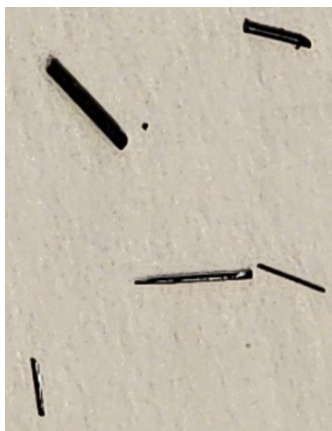

**Figure S2.** Needle shaped black crystals of 1:1 perylene:TCNQ.

**Table S1.** Crystallographic and refinement parameters for perylene:TCNQ cocrystal

|                                                                                              |                                                |
|----------------------------------------------------------------------------------------------|------------------------------------------------|
| chemical formula                                                                             | C <sub>32</sub> H <sub>16</sub> N <sub>4</sub> |
| formula weight                                                                               | 456.49                                         |
| temp (K)                                                                                     | 290(2)                                         |
| crystal system                                                                               | Monoclinic                                     |
| space group                                                                                  | <i>P</i> 2 <sub>1</sub> / <i>c</i>             |
| <i>a</i> (Å)                                                                                 | 7.2988(2)                                      |
| <i>b</i> (Å)                                                                                 | 10.8741(2)                                     |
| <i>c</i> (Å)                                                                                 | 14.5519(3)                                     |
| $\alpha$ (°)                                                                                 | 90                                             |
| $\beta$ (°)                                                                                  | 90.254(2)                                      |
| $\gamma$ (°)                                                                                 | 90                                             |
| <i>V</i> (Å <sup>3</sup> )                                                                   | 1154.94(4)                                     |
| <i>Z</i>                                                                                     | 2                                              |
| <i>F</i> <sub>000</sub>                                                                      | 472                                            |
| $\rho_{calcd}$ (g cm <sup>-3</sup> )                                                         | 1.313                                          |
| R <sub>1</sub> <sup>a</sup> , R <sub>1</sub> <sup>b</sup> (all data, $I \geq 2\sigma(I)$ )   | 0.0476, 0.0423                                 |
| wR <sub>2</sub> <sup>a</sup> , wR <sub>2</sub> <sup>b</sup> (all data, $I \geq 2\sigma(I)$ ) | 0.1228, 0.1178                                 |
| goodness of fit ( <i>F</i> <sup>2</sup> )                                                    | 1.033                                          |
| largest peak/hole (e Å <sup>-3</sup> )                                                       | 0.195/-0.213                                   |

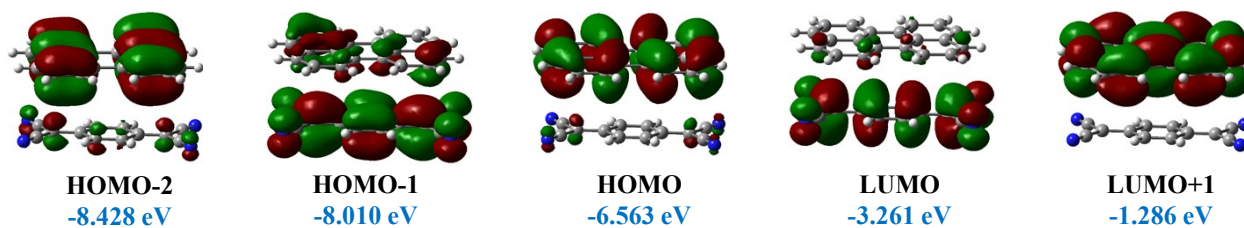

**Figure S3.** Frontier molecular orbitals of  $\pi$ -stacked D–A dimer calculated at CAM-B3LYP/6-31G(d,p) level of theory.

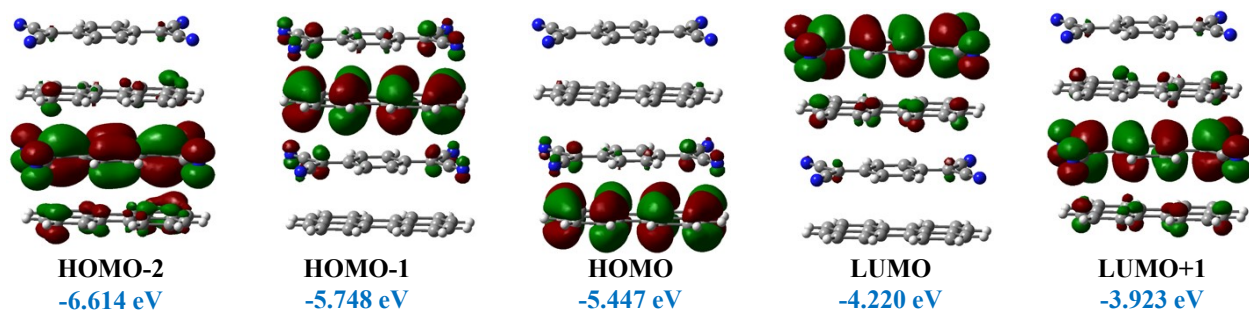

**Figure 4.** Frontier molecular orbitals of  $\pi$ -stacked D–A–D–A tetramer calculated at B3LYP-D3-BJ/6-31G(d,p) level of theory.

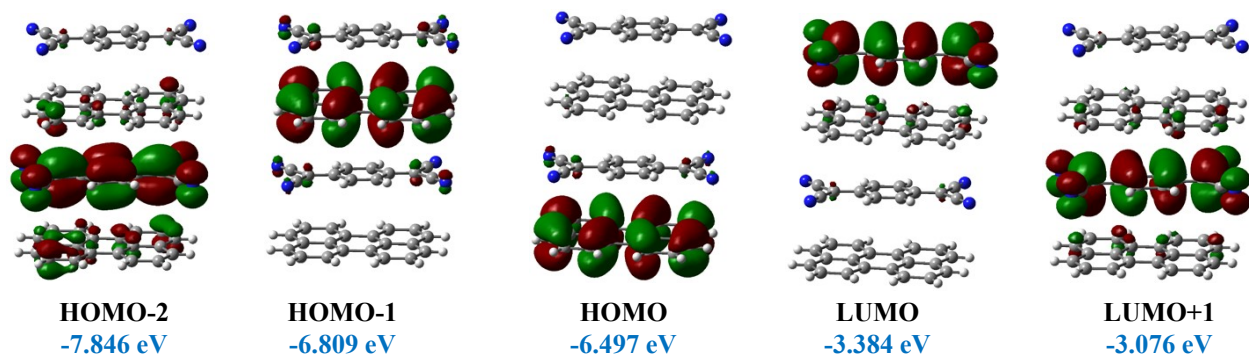

**Figure S5.** Frontier molecular orbitals of the  $\pi$ -stacked D–A–D–A tetramer calculated at CAM-B3LYP/6-31G(d,p) level of theory.

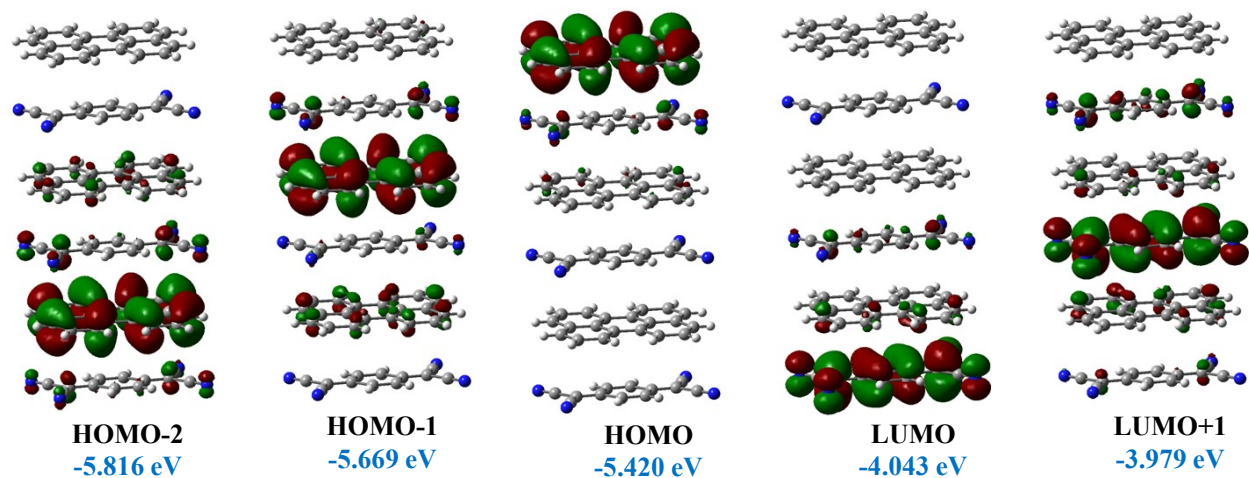

**Figure S6.** Frontier molecular orbitals of  $\pi$ -stacked D–A–D–A–D–A hexamer calculated at B3LYP-D3-BJ/6-31G(d,p) level of theory.

**Table S2.** Calculate wavelength, transition energy, oscillator strength and orbital contributions for  $S_0 \rightarrow S_1$ ,  $S_0 \rightarrow S_2$  and  $S_0 \rightarrow S_3$  transitions in  $\pi$ -stacked D–A dimer at  $\omega$ 97X-D/6-31G(d,p) level

| Transitions           | Wavelength (nm) | Energy (eV) | Oscillator strength | Orbital contribution                                                                                                                            |
|-----------------------|-----------------|-------------|---------------------|-------------------------------------------------------------------------------------------------------------------------------------------------|
| $S_0 \rightarrow S_1$ | 784             | 1.59        | 0.0717              | HOMO $\rightarrow$ LUMO, 100%                                                                                                                   |
| $S_0 \rightarrow S_2$ | 420             | 2.95        | 0.1654              | HOMO-1 $\rightarrow$ LUMO, 75.66%<br>HOMO $\rightarrow$ LUMO+1, 24.34%                                                                          |
| $S_0 \rightarrow S_3$ | 380             | 3.26        | 0.0548              | HOMO-6 $\rightarrow$ LUMO, 4.82%<br>HOMO-3 $\rightarrow$ LUMO, 50.49%<br>HOMO-2 $\rightarrow$ LUMO, 32.96%<br>HOMO $\rightarrow$ LUMO+1, 11.73% |

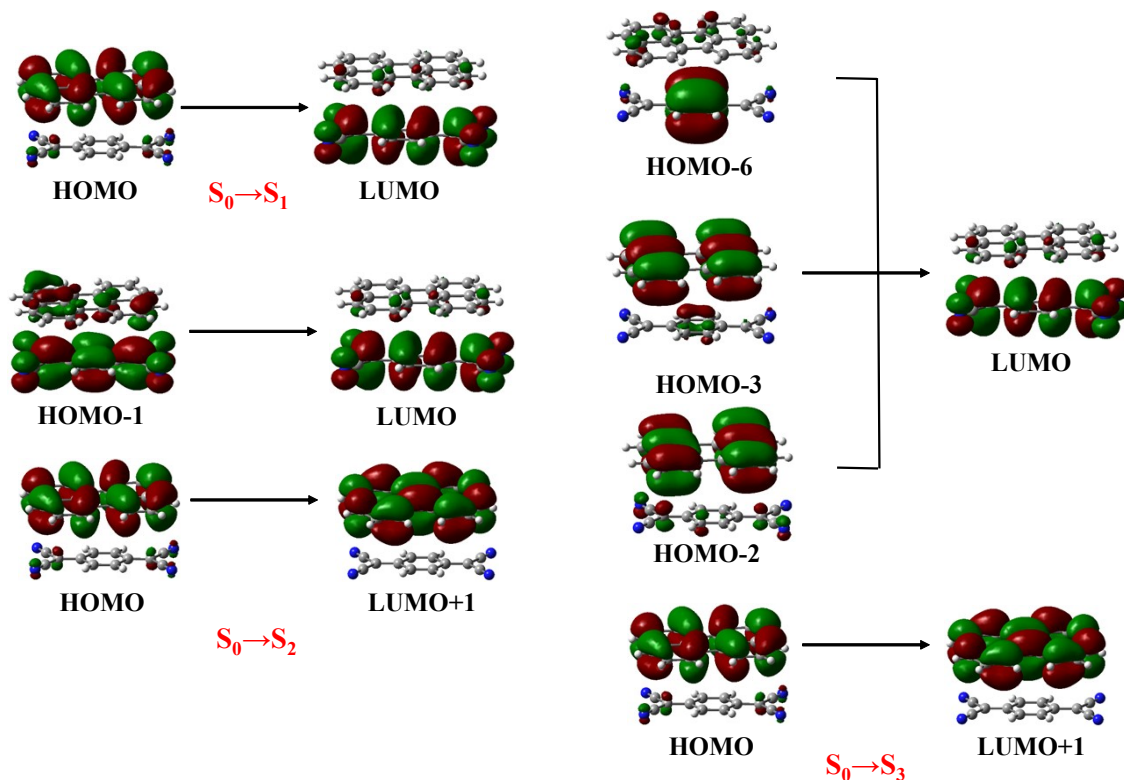

**Figure S7.** Molecular orbitals taking part in the  $S_0 \rightarrow S_1$ ,  $S_0 \rightarrow S_2$  and  $S_0 \rightarrow S_3$  transitions of  $\pi$ -stacked D–A dimer, time dependent DFT analysis was carried out  $\omega$ 97X-D/6-31G(d,p) level.

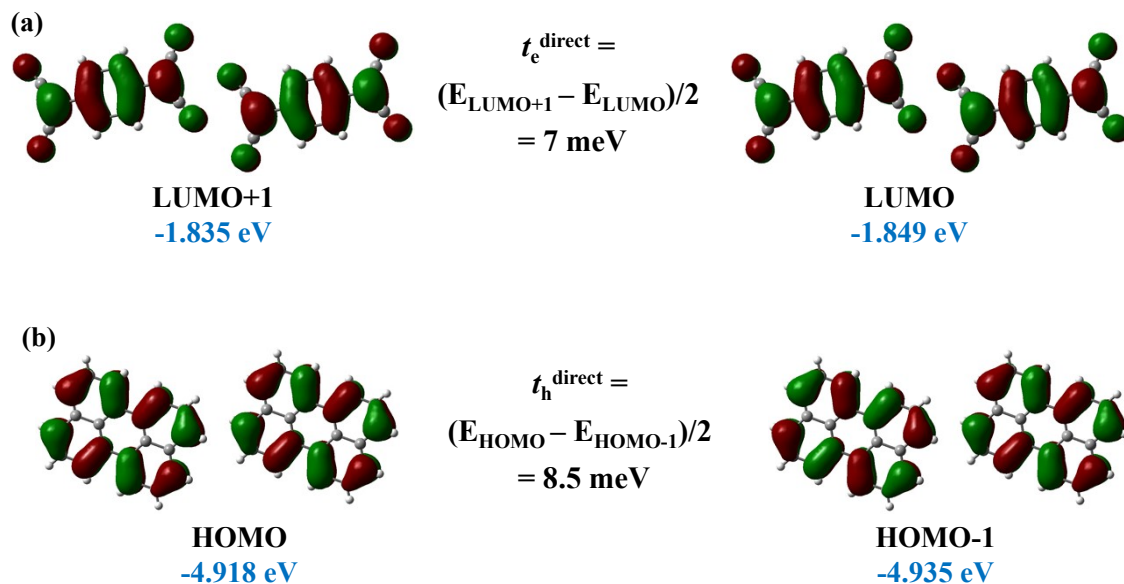

**Figure S8.** (a) Direct electron transfer integral calculated from nearest acceptor A–A dimer; (b) direct hole transfer integral calculated from nearest donor D–D dimer.

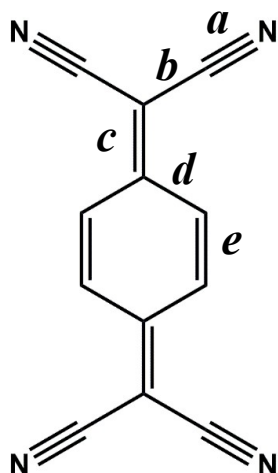

**Table S3.** Bond-lengths in optimized neutral and anionic geometries of TCNQ

| Bond-length | Neutral (Å) | Anion (Å) |
|-------------|-------------|-----------|
| <i>a</i>    | 1.165       | 1.170     |
| <i>b</i>    | 1.427       | 1.416     |
| <i>c</i>    | 1.390       | 1.432     |
| <i>d</i>    | 1.447       | 1.425     |
| <i>e</i>    | 1.355       | 1.375     |

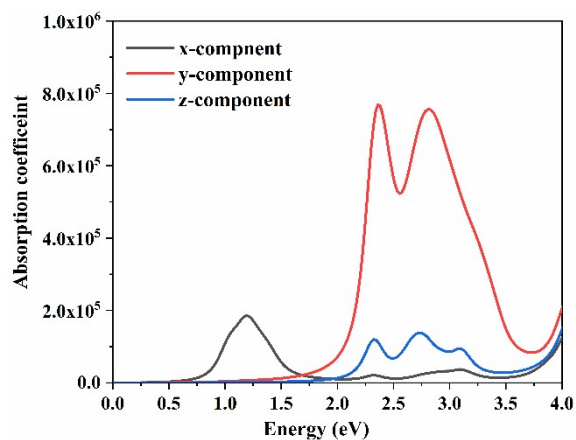

**Figure S9.** Calculated absorption spectrum from periodic DFT calculation using HSE06 functional on the unit cell experimental geometry with Monkhorst pack  $5 \times 3 \times 2$  mesh k-points, energy cut-off 500 eV and Gaussian smearing.

**Table S4.** Coordinates of high symmetry points along the first Brillouin zone in 1:1 perylene:TCNQ cocrystal system

| High symmetry point | Coordinates    |
|---------------------|----------------|
| $\Gamma$            | 0, 0, 0        |
| Z                   | 0, 0.5, 0      |
| D                   | 0, 0.5, 0.5    |
| B                   | 0, 0, 0.5      |
| A                   | -0.5, 0, 0.5   |
| E                   | -0.5, 0.5, 0.5 |
| Z                   | 0, 0.5, 0      |
| C                   | -0.5, 0.5, 0   |
| Y                   | -0.5, 0, 0     |

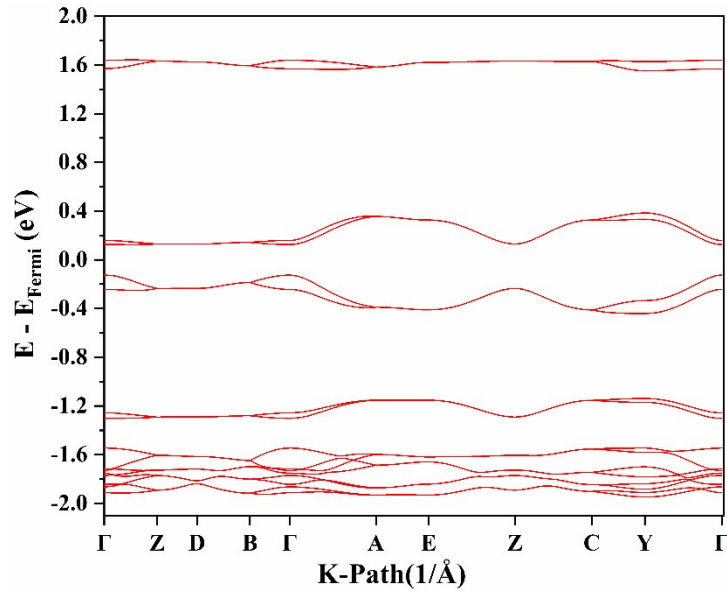

**Figure S10.** Band structure of 1:1 perylene:TCNQ cocrystal calculated on experimental geometry with GGA functional PBE using line mode k-points, 600 eV energy cut-off, and Gaussian smearing.

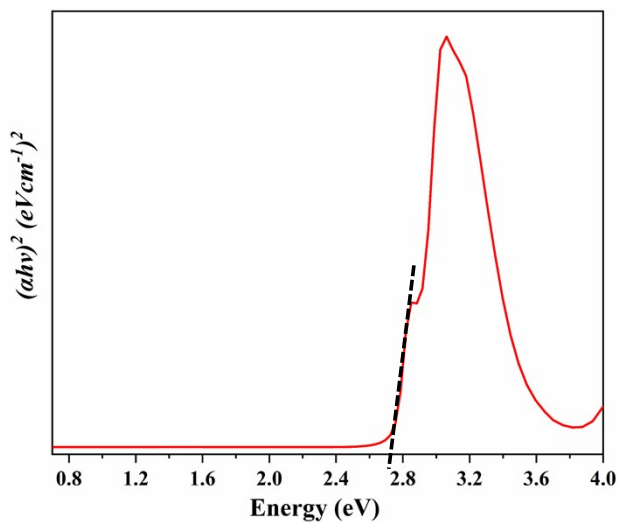

**Figure S11.** Tauc plot for 1:1 perylene:TCNQ cocrystal by fitting the direct bandgap equation:  $(\alpha h\nu)^2 = h\nu - E_g$ , while  $\alpha$  = absorbance,  $h\nu$  = energy and  $E_g$  = bandgap.

**Table S5.** Coordinates of the high symmetry points along the first Brillouin zone in 1-aminopyrene:TCNQ cocrystal system

| High symmetry point | Coordinates   |
|---------------------|---------------|
| $\Gamma$            | 0, 0, 0       |
| Z                   | 0, 0, 0.5     |
| X                   | 0.5, 0, 0     |
| Y                   | 0, 0.5, 0     |
| R                   | 0.5, 0.5, 0.5 |
| T                   | 0, 0.5, 0.5   |
| U                   | 0.5, 0, 0.5   |
| V                   | 0.5, 0, 0     |

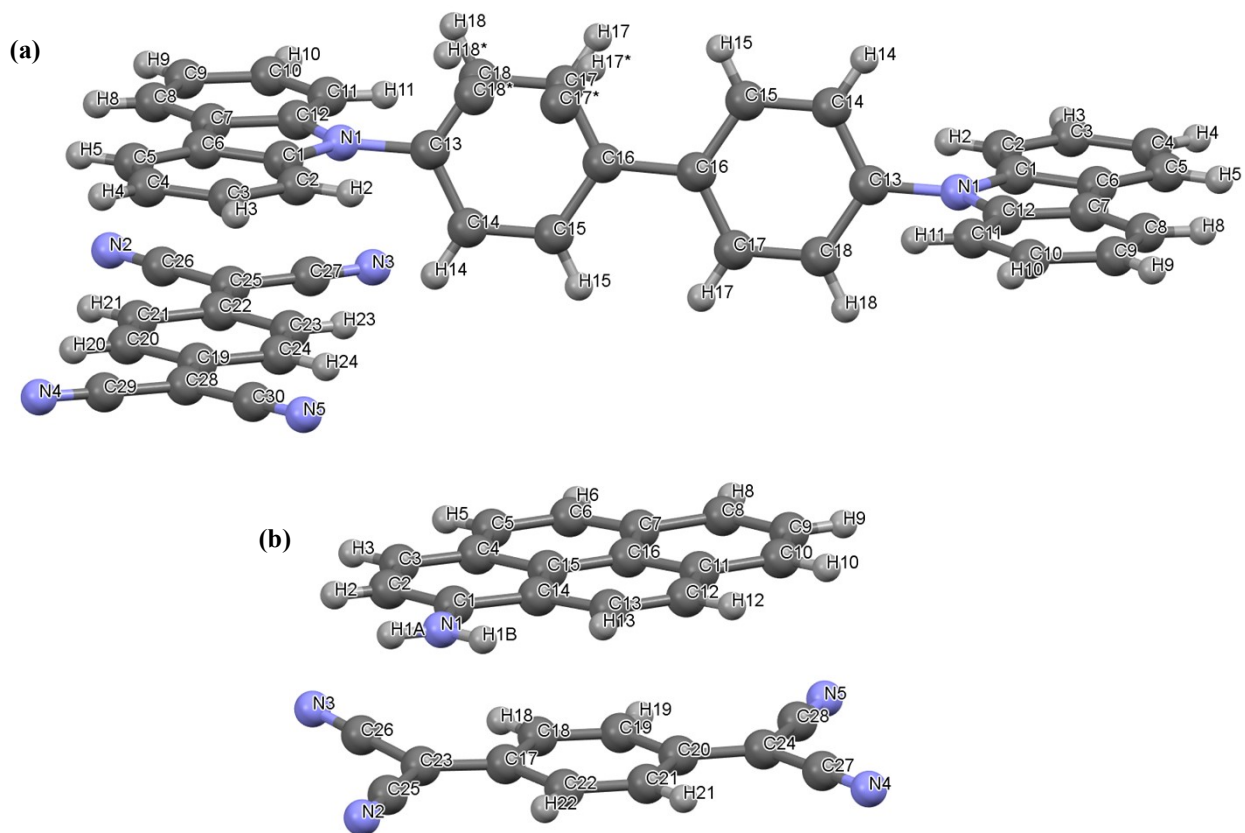

**Figure S12.** (a) Asymmetric unit of the CBP:(TCNQ)<sub>2</sub> cocrystal; (b) asymmetric unit of the 1-aminopyrene:TCNQ cocrystal.

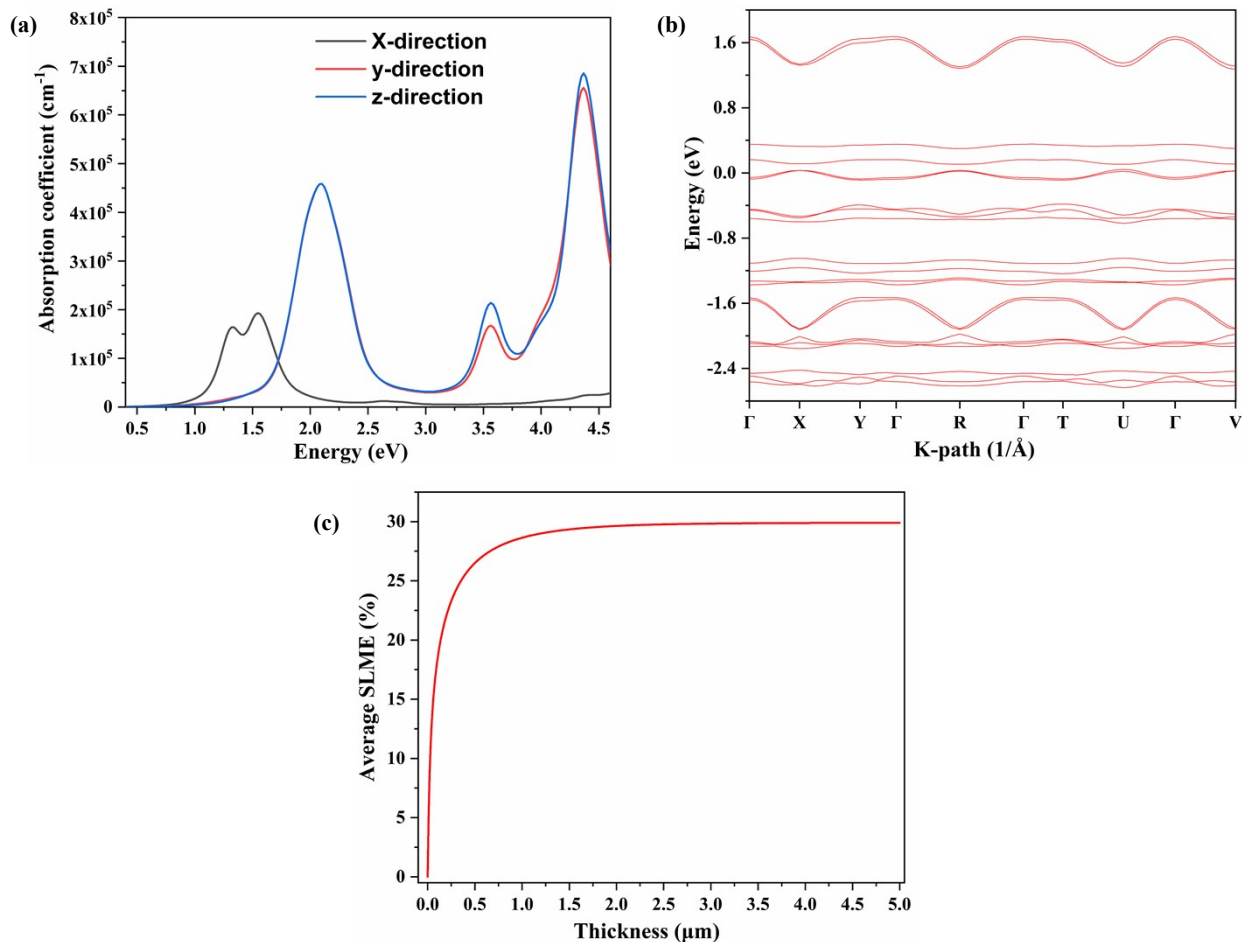

**Figure S13.** (a) Calculated absorption spectrum of 1:2 CBP:(TCNQ)<sub>2</sub> cocrystal from periodic DFT calculation using HSE06 functional on the unit cell experimental geometry with Monkhorst pack  $4 \times 3 \times 1$  mesh k-points, energy cut-off 500 eV and Gaussian smearing; (b) the band structure of CBP:(TCNQ)<sub>2</sub> cocrystal using HSE06 functional on the unit cell experimental geometry with Monkhorst pack  $4 \times 3 \times 1$  mesh k-points, energy cut-off 500 eV and Gaussian smearing; (c) spectroscopic limited maximal efficiency (SLME) calculated using HSE06 functional.

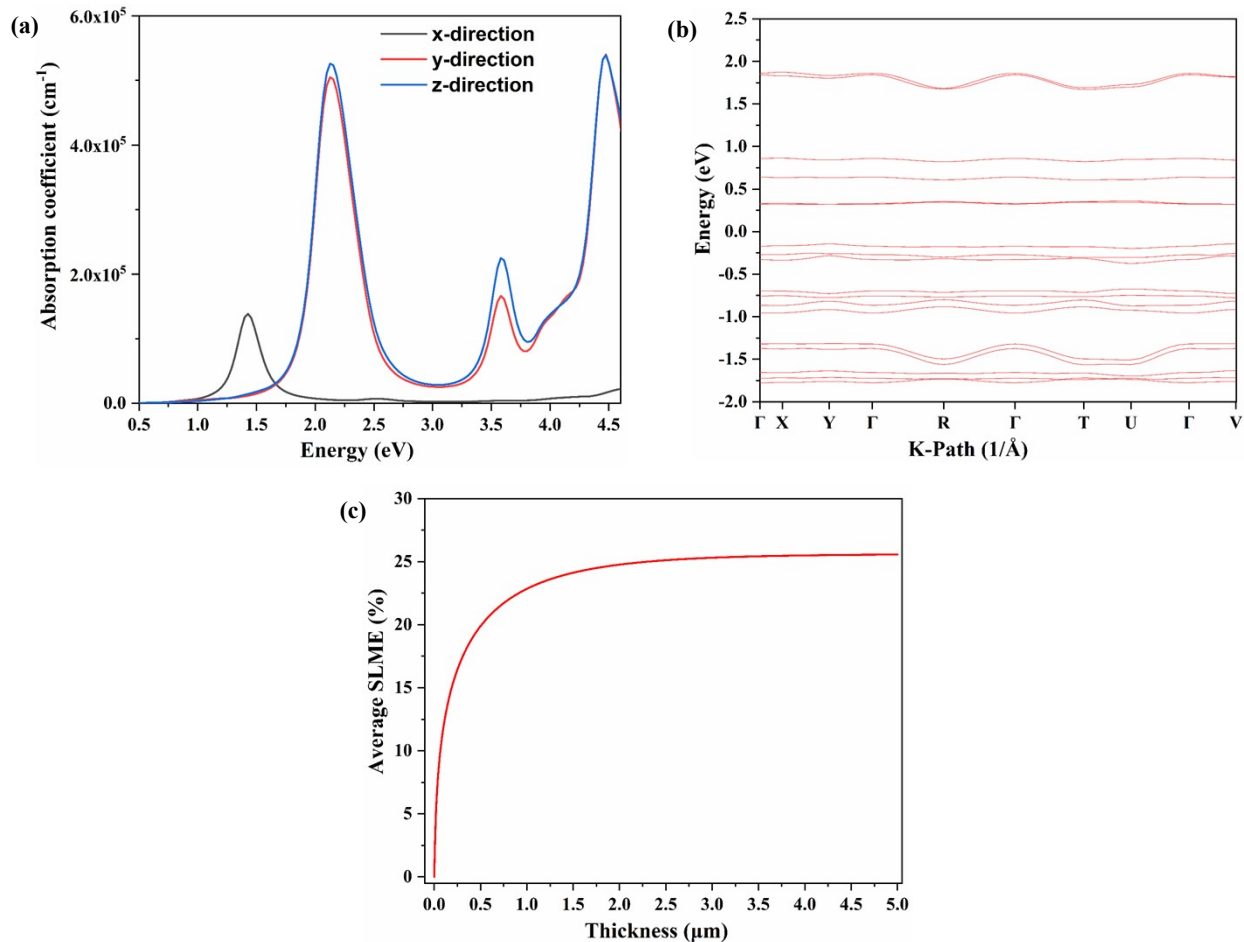

**Figure S14.** (a) Calculated absorption spectrum of 1:2 CBP:(TCNQ)<sub>2</sub> cocrystal from periodic DFT calculation using HSE06 functional on the unit cell experimental geometry with Monkhorst pack  $4 \times 3 \times 1$  mesh k-points, energy cut-off 500 eV and Gaussian smearing; (b) the band structure of CBP:(TCNQ)<sub>2</sub> cocrystal using HSE06 functional on the unit cell experimental geometry with Monkhorst pack  $4 \times 3 \times 1$  mesh k-points, energy cut-off 500 eV and Gaussian smearing; (c) spectroscopic limited maximal efficiency (SLME) calculated using HSE06 functional.
